# Supplementary material for: Engineering hierarchical manganese molybdenum sulfide nanosheet integrated cathodes for high-energy density hybrid supercapacitors
Source: Royal Society of Chemistry journal article supplement (doi:10.1039/d3nj02300a), 2023-01-01
Supplement: d3nj02300a1.pdf [file d3nj02300a1.pdf]

## Supplementary Materials

# **Engineering hierarchical manganese molybdenum sulfide nanosheets integrated cathode for high-energy density hybrid supercapacitors**

Chao Li,<sup>a,b</sup> Qiong Liu,<sup>a</sup> Lu Liu,<sup>a</sup> Ge Wu,<sup>a</sup> Yulong Zhang,<sup>a</sup> Sihan Liu,<sup>a</sup> Ruhua Zha,<sup>a,b</sup>  
Yu Zhang,<sup>\*a,b</sup> Qing Li<sup>\*a,b</sup>

<sup>a</sup> College of Chemistry and Chemical Engineering, Xinyang Normal University, Xinyang  
464000, China

<sup>b</sup> Xinyang Key Laboratory of Low-Carbon Energy Materials, Xinyang Normal University,  
Xinyang 464000, China

\*Corresponding authors.

E-mail addresses: yuzhang@xynu.edu.cn; lqlq0312@163.com.

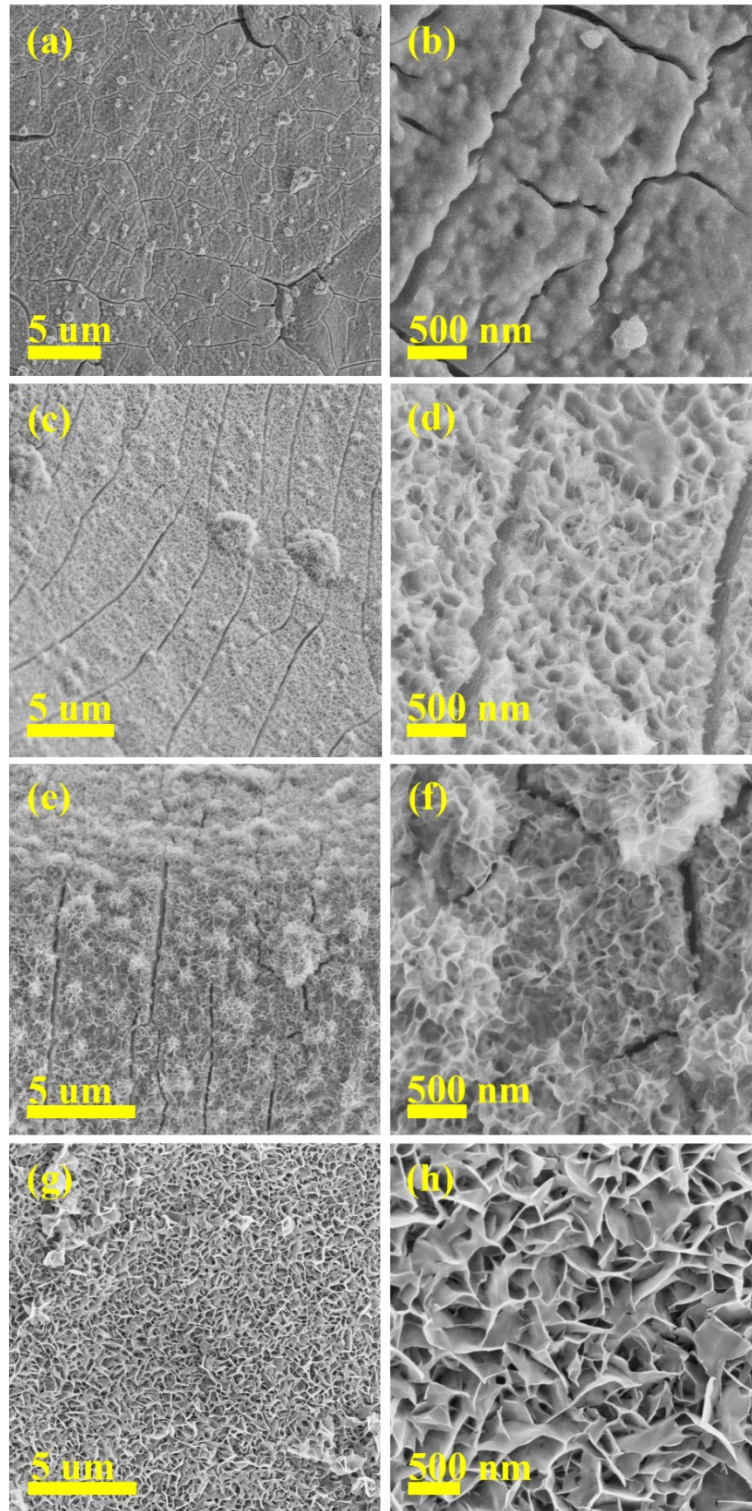

**Fig.S1.** Low- and high-magnification SEM images for  $\text{MnMoO}_4 \cdot \text{H}_2\text{O}$  NSs by performing the hydrothermal reactions for 2-8h; (a) and (b) for  $\text{MnMoO}_4 \cdot \text{H}_2\text{O}$  NSs-2; (c) and (d) for  $\text{MnMoO}_4 \cdot \text{H}_2\text{O}$  NSs-4; (e) and (f) for  $\text{MnMoO}_4 \cdot \text{H}_2\text{O}$  NSs-6; (g) and (h) for  $\text{MnMoO}_4 \cdot \text{H}_2\text{O}$  NSs-8.

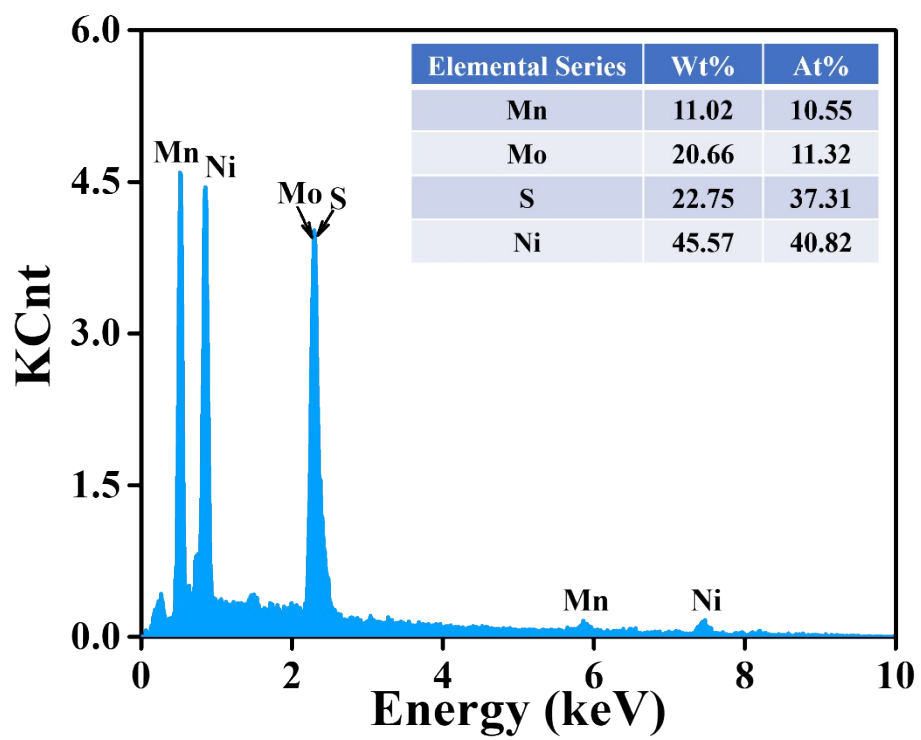

Fig.S2. EDAX spectrum for Mn-Mo-S NSs.

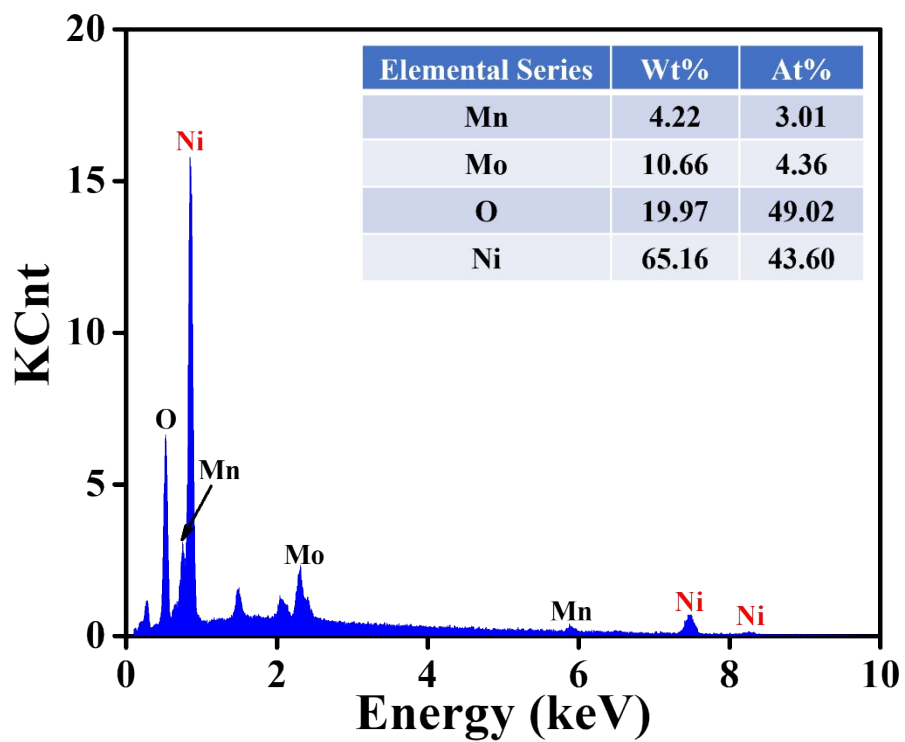

Fig.S3. EDAX spectrum for MnMoO<sub>4</sub>·H<sub>2</sub>O NSs-8.

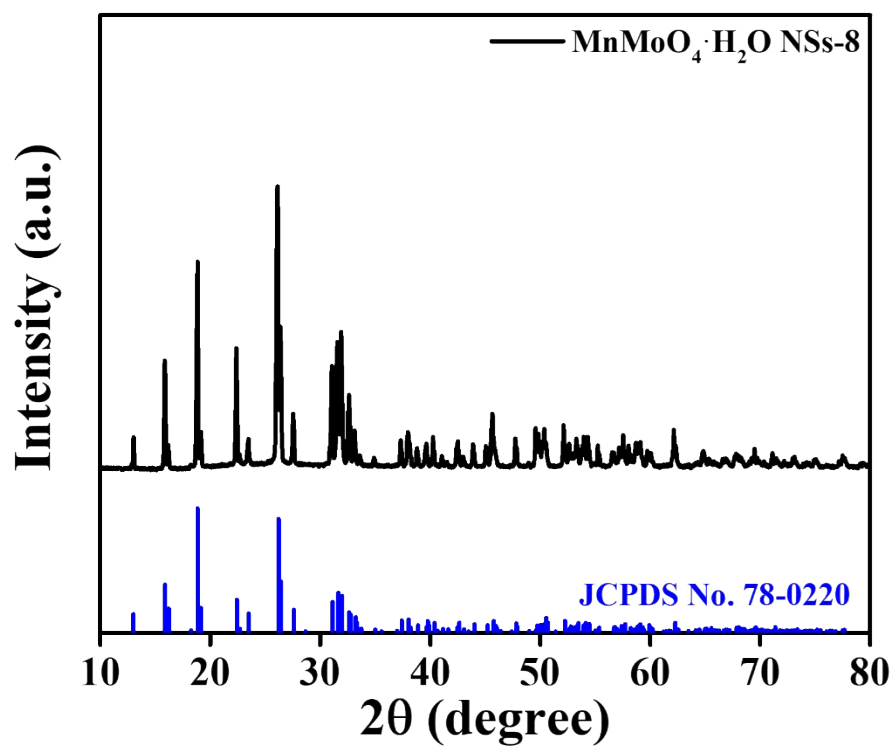

**Fig.S4.** XRD pattern for MnMoO<sub>4</sub>·H<sub>2</sub>O NSs-8.

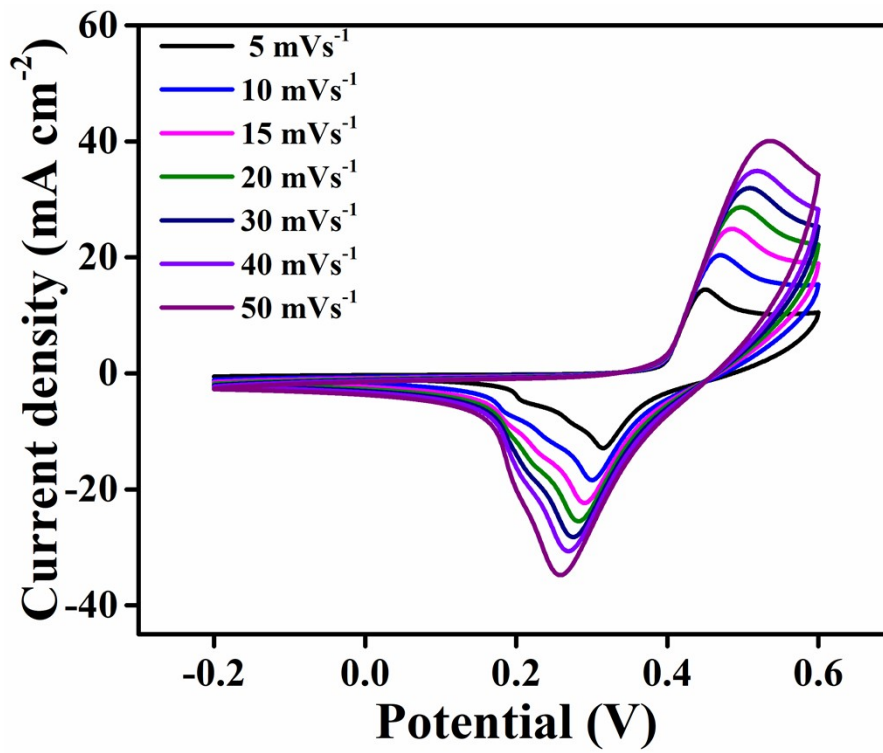

**Fig.S5.** CV curves for MnMoO<sub>4</sub>·H<sub>2</sub>O NSs-8.

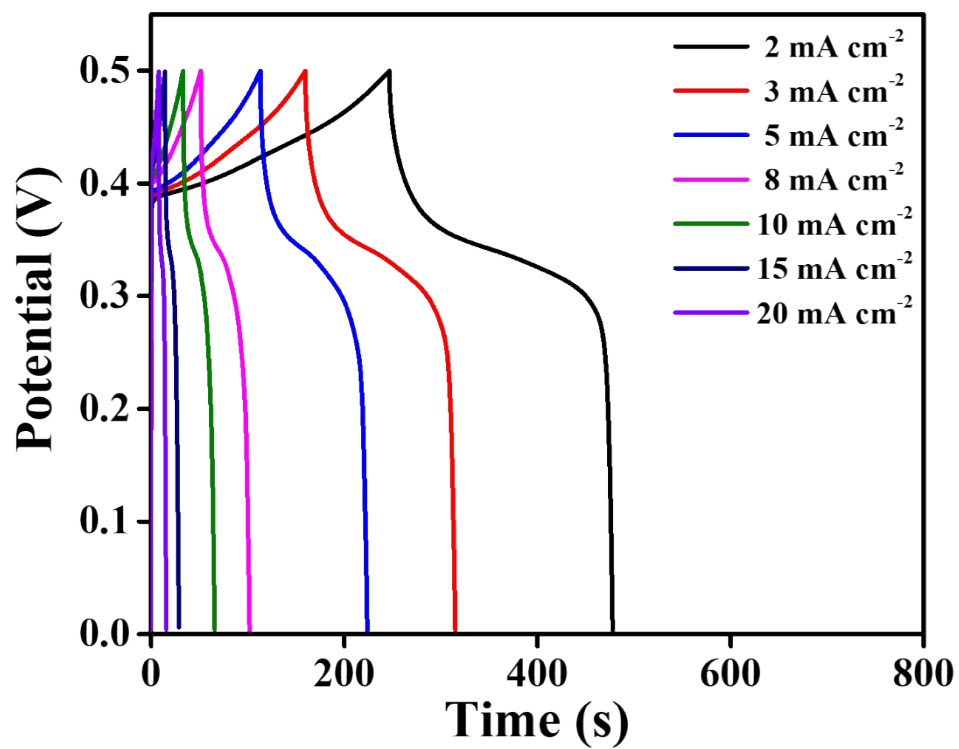

**Fig.S6.** GCD curves for MnMoO<sub>4</sub>·H<sub>2</sub>O NSs-8.

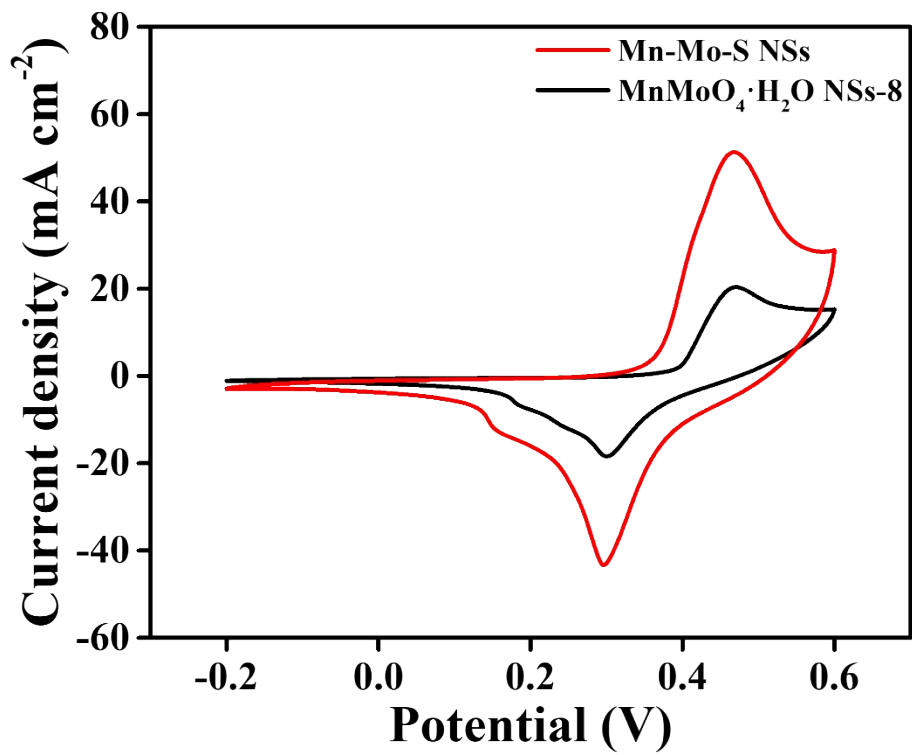

**Fig.S7.** CV curves comparison of Mn-Mo-S NSs and MnMoO<sub>4</sub>·H<sub>2</sub>O NSs-8 at 10 mV s<sup>-1</sup>.



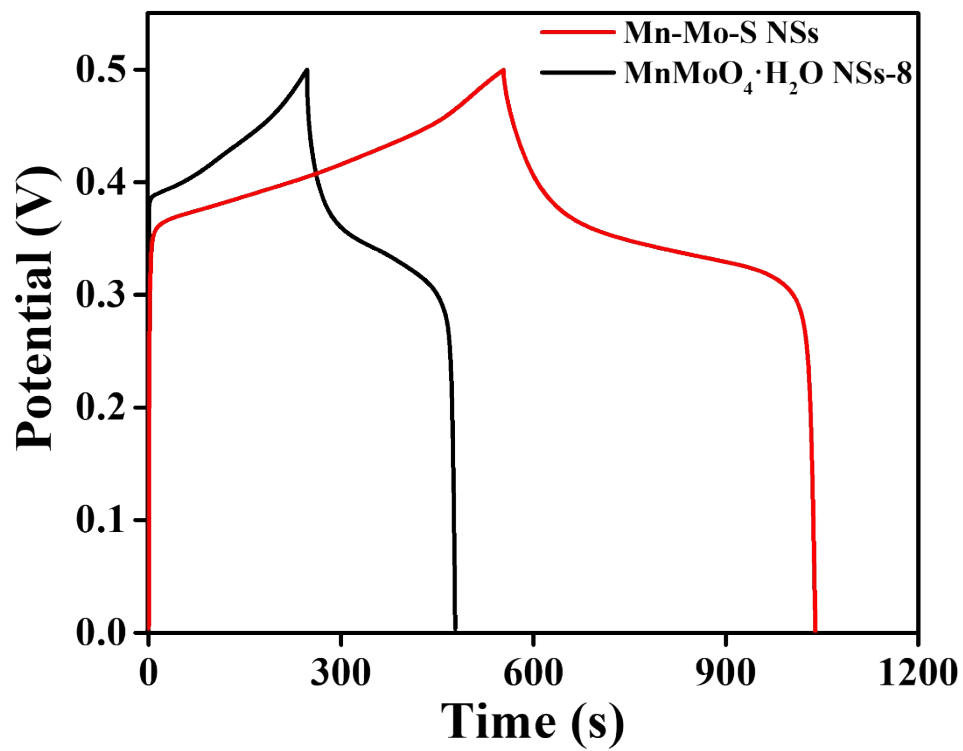

**Fig.S8.** GCD curves comparison of Mn-Mo-S NSs and MnMoO<sub>4</sub>·H<sub>2</sub>O NSs-8 at 2 mA cm<sup>-2</sup>.

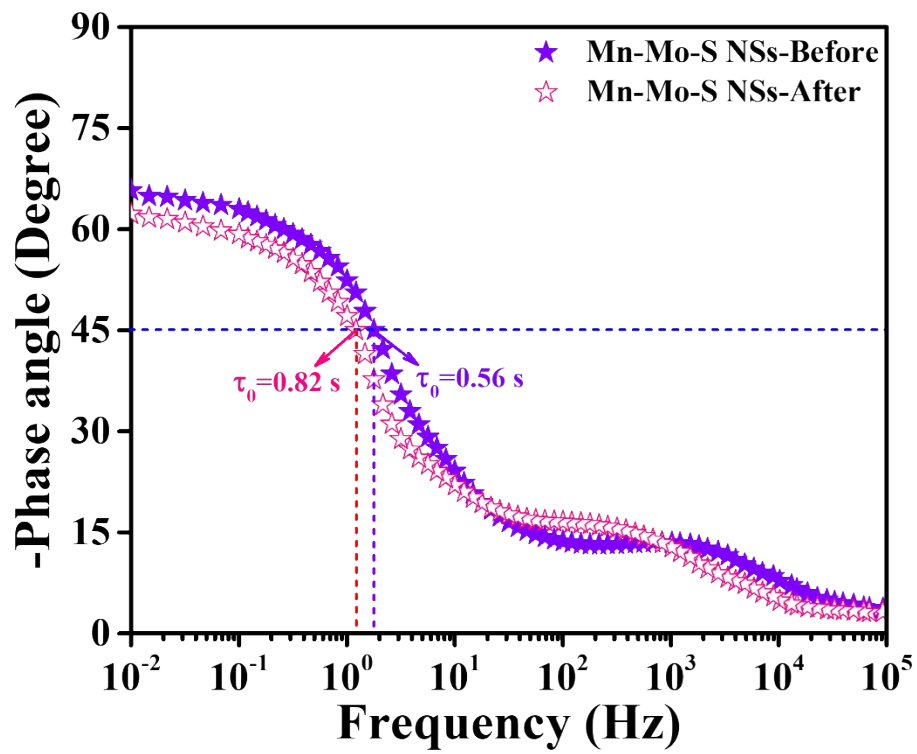

Fig.S9. Bode phase angle plots of Mn-Mo-S NSs-Before and Mn-Mo-S NSs-After.

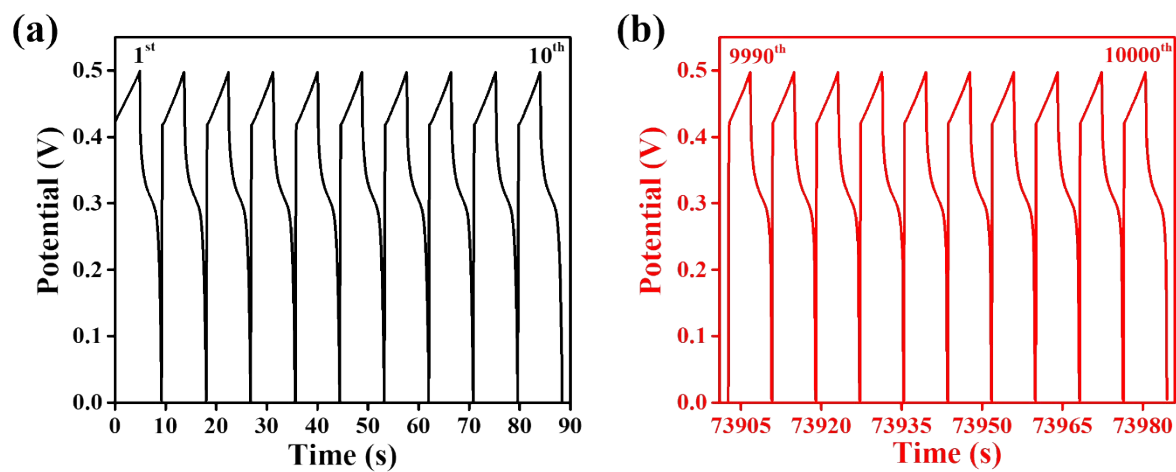

**Fig.S10.** The initial and final 10 GCD cycles for Mn-Mo-S NSs integrated cathode in the cyclic stability test at  $50 \text{ mA cm}^{-2}$  for 10000 GCD cycles.

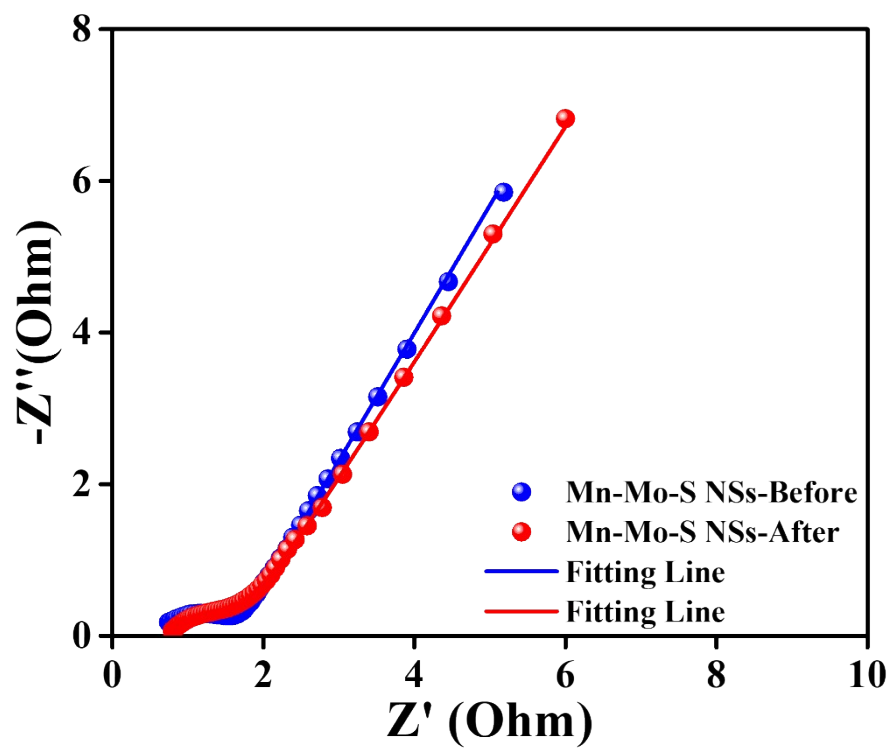

**Fig.S11.** EIS spectra comparison of Mn-Mo-S NSs-Before and Mn-Mo-S NSs-After.

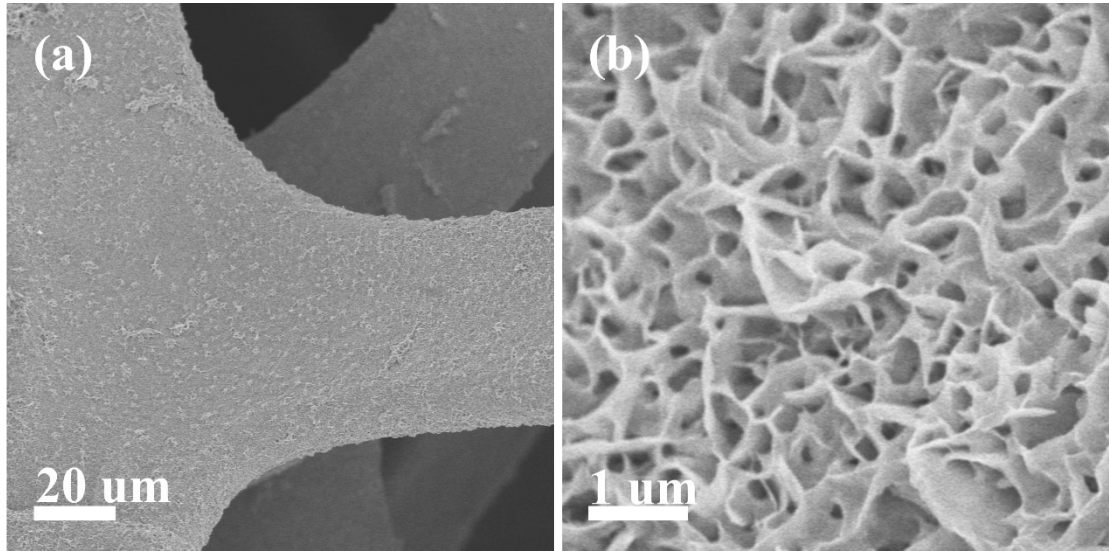

**Fig.S12.** SEM images for Mn-Mo-S NSs-After.

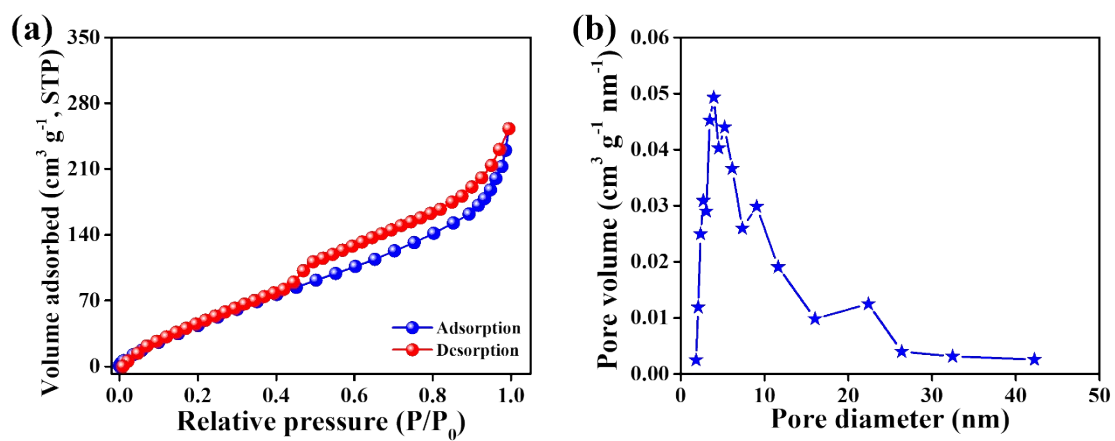

**Fig.S13.** (a)  $N_2$  adsorption-desorption isotherm and (b) pore size distribution for Mn-Mo-S NSs-After.

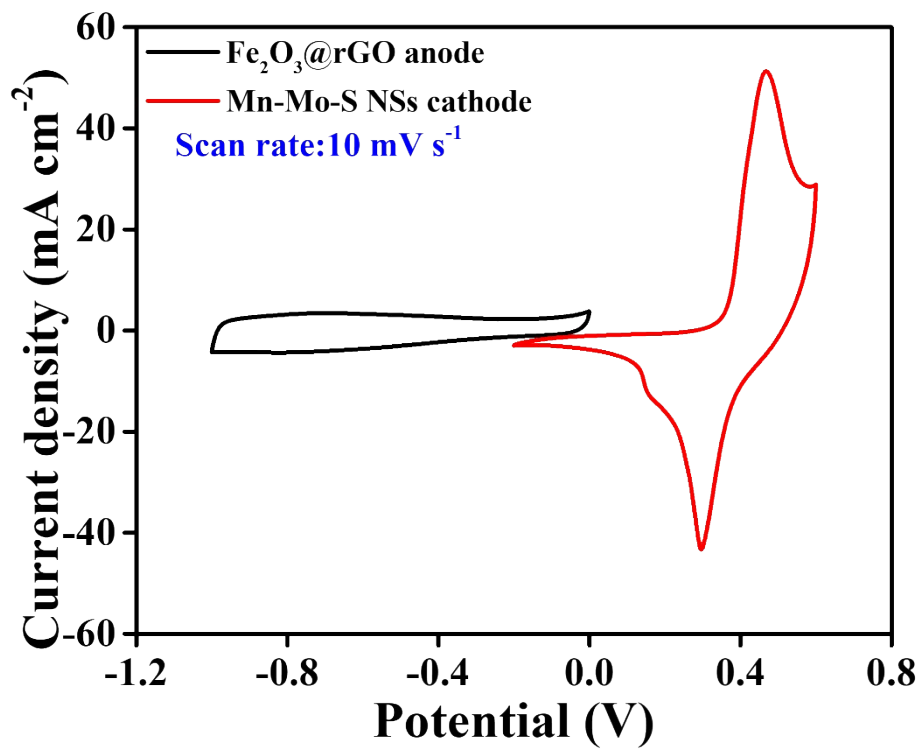

**Fig.S14.** CV curves of Mn-Mo-S NSs cathode and Fe<sub>2</sub>O<sub>3</sub>@rGO anode at 10 mV s<sup>-1</sup>.

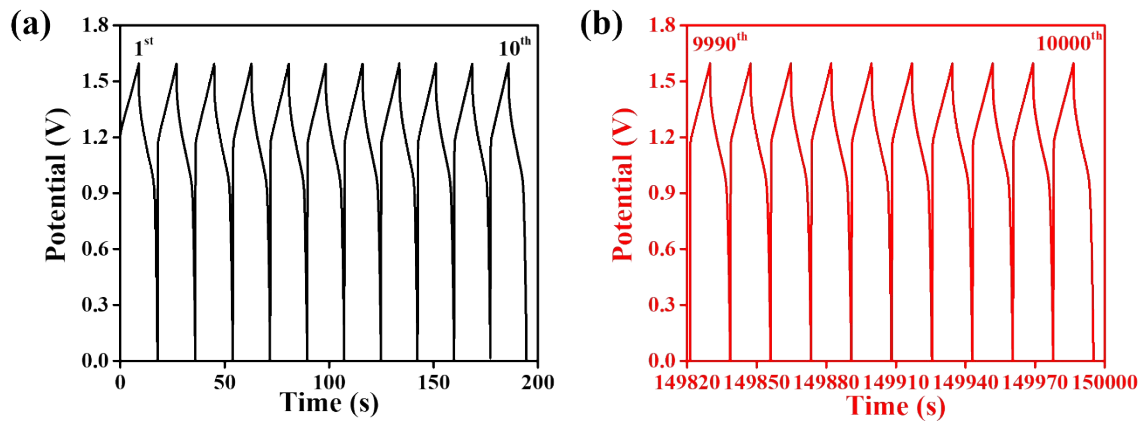

**Fig.S15.** The initial and final 10 GCD cycles for Mn-Mo-S NSs//Fe<sub>2</sub>O<sub>3</sub>@rGO HSC in the cyclic stability test at 50 mA cm<sup>-2</sup> for 10000 GCD cycles.



**Table S1.** The elemental composition of Mn-Mo-S NSs integrated cathode before and after cycling tests confirmed by the ICP-OES measurements.

| <b>Electrode materials</b> | <b>Mn (at.%)</b> | <b>Mo (at.%)</b> | <b>S (at.%)</b> | <b>O (at.%)</b> |
|----------------------------|------------------|------------------|-----------------|-----------------|
| Mn-Mo-S NSs-Before         | 12.21            | 36.72            | 48.73           | 2.34            |
| Mn-Mo-S NSs-After          | 12.13            | 36.67            | 47.33           | 3.87            |

**Table S2.** The corresponding electrochemical performance for  $\text{MnMoO}_4 \cdot \text{H}_2\text{O}$  NS-8 and Mn-Mo-S NSs integrated cathode obtained from the CV data in Fig.S5 and Fig.4a.

| Electrode materials                               | Scan rate ( $\text{mVs}^{-1}$ ) | Anodic peak position (V) | Anodic peak current (A) | Cathodic peak position (V) | Cathodic peak current (A) | CV integrated area |
|---------------------------------------------------|---------------------------------|--------------------------|-------------------------|----------------------------|---------------------------|--------------------|
| $\text{MnMoO}_4 \cdot \text{H}_2\text{O}$<br>NS-8 | 5                               | 0.449                    | 0.0289                  | 0.315                      | -0.0258                   | 0.0097             |
|                                                   | 10                              | 0.471                    | 0.0408                  | 0.301                      | -0.0368                   | 0.0151             |
|                                                   | 15                              | 0.484                    | 0.0498                  | 0.291                      | -0.0447                   | 0.0186             |
|                                                   | 20                              | 0.497                    | 0.0573                  | 0.282                      | -0.0511                   | 0.0215             |
|                                                   | 30                              | 0.509                    | 0.0639                  | 0.275                      | -0.0565                   | 0.0260             |
|                                                   | 40                              | 0.518                    | 0.0698                  | 0.269                      | -0.0613                   | 0.0297             |
|                                                   | 50                              | 0.536                    | 0.0801                  | 0.259                      | -0.0696                   | 0.0329             |
| Mn-Mo-S NSs                                       | 5                               | 0.446                    | 0.0342                  | 0.309                      | -0.0291                   | 0.0105             |
|                                                   | 10                              | 0.467                    | 0.0513                  | 0.298                      | -0.0432                   | 0.0173             |
|                                                   | 15                              | 0.485                    | 0.0639                  | 0.288                      | -0.0532                   | 0.0225             |
|                                                   | 20                              | 0.499                    | 0.0745                  | 0.281                      | -0.0614                   | 0.0291             |
|                                                   | 30                              | 0.52                     | 0.0918                  | 0.268                      | -0.0745                   | 0.0348             |
|                                                   | 40                              | 0.536                    | 0.1063                  | 0.258                      | -0.0854                   | 0.0412             |
|                                                   | 50                              | 0.555                    | 0.1192                  | 0.248                      | -0.0947                   | 0.0466             |

**Table S3.** The corresponding electrochemical performance for MnMoO<sub>4</sub>·H<sub>2</sub>O NSs-8 and Mn-Mo-S NSs integrated cathode obtained from the GCD data in Fig.S6 and Fig.4b.

| Electrode materials                        | Current density (mA cm <sup>-2</sup> ) | Charge time (s) | Discharge time (s) | Charge capacity (mAh cm <sup>-2</sup> /mAh g <sup>-1</sup> ) | Discharge capacity (mAh cm <sup>-2</sup> /mAh g <sup>-1</sup> ) | Rate capability |
|--------------------------------------------|----------------------------------------|-----------------|--------------------|--------------------------------------------------------------|-----------------------------------------------------------------|-----------------|
| MnMoO <sub>4</sub> ·H <sub>2</sub> O NSs-8 | 2                                      | 232.4           | 231.2              | 0.14/264.2                                                   | 0.139/262.3                                                     | 53.2%           |
|                                            | 3                                      | 162.6           | 159.8              | 0.129/243.4                                                  | 0.128/241.5                                                     |                 |
|                                            | 5                                      | 118.7           | 113.2              | 0.115/217                                                    | 0.114/215.1                                                     |                 |
|                                            | 8                                      | 52.1            | 51.2               | 0.107/201.9                                                  | 0.106/200                                                       |                 |
|                                            | 10                                     | 34.6            | 33.3               | 0.103/194.4                                                  | 0.102/192.5                                                     |                 |
|                                            | 15                                     | 15.7            | 14.5               | 0.087/166.1                                                  | 0.086/164.2                                                     |                 |
|                                            | 20                                     | 9.2             | 8                  | 0.075/141.5                                                  | 0.074/139.6                                                     |                 |
| Mn-Mo-S NSs                                | 2                                      | 556.8           | 553.4              | 0.375/394.7                                                  | 0.373/392.6                                                     | 60.6%           |
|                                            | 3                                      | 319.7           | 317.4              | 0.345/363.2                                                  | 0.344/362.1                                                     |                 |
|                                            | 5                                      | 166.4           | 165                | 0.29/305.3                                                   | 0.289/304.2                                                     |                 |
|                                            | 8                                      | 89.1            | 87.5               | 0.258/271.6                                                  | 0.257/270.5                                                     |                 |
|                                            | 10                                     | 64.2            | 63.5               | 0.243/255.8                                                  | 0.242/254.7                                                     |                 |
|                                            | 15                                     | 36.3            | 35                 | 0.236/248.5                                                  | 0.235/247.4                                                     |                 |
|                                            | 20                                     | 23.4            | 22.5               | 0.227/239                                                    | 0.226/237.9                                                     |                 |

**Table S4.** EIS spectra fitting results for MnMoO<sub>4</sub>·H<sub>2</sub>O NSs-8, Mn-Mo-S NSs integrated cathode before and after cycling stability measurements.

| <b>Electrode materials</b>                 | <b>R<sub>s</sub><br/>(Ω)</b> | <b>CPE<sub>1</sub>-T<br/>(mF)</b> | <b>R<sub>ct</sub><br/>(Ω)</b> | <b>Z<sub>w</sub>-R<br/>(Ω)</b> | <b>Z<sub>w</sub>-T<br/>(Ω)</b> | <b>CPE<sub>2</sub>-T<br/>(mF)</b> |
|--------------------------------------------|------------------------------|-----------------------------------|-------------------------------|--------------------------------|--------------------------------|-----------------------------------|
| MnMoO <sub>4</sub> ·H <sub>2</sub> O NSs-8 | 1.138                        | 0.0053                            | 1.635                         | 6.265                          | 11.62                          | 0.355                             |
| Mn-Mo-S NSs-Before                         | 0.763                        | 0.0649                            | 0.838                         | 0.305                          | 2.73                           | 1.598                             |
| Mn-Mo-S NSs-After                          | 0.791                        | 0.0376                            | 1.086                         | 0.772                          | 8.66                           | 1.339                             |

**Table S5.** Electrochemical properties comparison of Mn-Mo-S NSs with recently reported TMSs-type electrode materials in literatures.

| Electrode materials                                        | Areal capacitance/<br>capacity<br>(F cm <sup>-2</sup> /mAh cm <sup>-2</sup> ) | Specific<br>capacitance/<br>capacity<br>(F g <sup>-1</sup> /mAh g <sup>-1</sup> ) | Current load<br>(A g <sup>-1</sup> /mA cm <sup>-2</sup> ) | Electrolyte | Stability<br>(Cycles) | Ref.         |
|------------------------------------------------------------|-------------------------------------------------------------------------------|-----------------------------------------------------------------------------------|-----------------------------------------------------------|-------------|-----------------------|--------------|
| MnMoS <sub>4</sub> @CNF                                    | -                                                                             | 1727.9 F g <sup>-1</sup>                                                          | 1 A g <sup>-1</sup>                                       | 3M KOH      | 84%<br>6000           | 1            |
| FeCo <sub>2</sub> S <sub>4</sub> @Ni@Gr                    | -                                                                             | 390 mAh g <sup>-1</sup>                                                           | 1 A g <sup>-1</sup>                                       | 3M KOH      | 58.1%<br>10000        | 2            |
| NiCo <sub>2</sub> S <sub>4</sub> /rGO                      | -                                                                             | 1072 F g <sup>-1</sup>                                                            | 1 A g <sup>-1</sup>                                       | 6M KOH      | -                     | 3            |
| NiCoS@PPy                                                  | -                                                                             | 2316.6 F g <sup>-1</sup>                                                          | 1 A g <sup>-1</sup>                                       | 2M KOH      | -                     | 4            |
| rGO/PANI@NiMoS <sub>4</sub>                                | -                                                                             | 194 mAh g <sup>-1</sup>                                                           | 0.75 A g <sup>-1</sup>                                    | 1M KOH      | -                     | 5            |
| NiCo <sub>2</sub> S <sub>4</sub> @HCs                      | -                                                                             | 3178.2 F g <sup>-1</sup>                                                          | 1 A g <sup>-1</sup>                                       | 2M KOH      | 95.9%<br>5000         | 6            |
| ZnCo <sub>2</sub> S <sub>4</sub> @ppy                      | -                                                                             | 1486 F g <sup>-1</sup>                                                            | 1 A g <sup>-1</sup>                                       | 3M KOH      | 72.9%<br>5000         | 7            |
| MnCo <sub>2</sub> S <sub>4</sub>                           | -                                                                             | 129.7 mAh g <sup>-1</sup>                                                         | 1 A g <sup>-1</sup>                                       | 3M KOH      | 87.81%<br>4000        | 8            |
| Ravine-like MnCo <sub>2</sub> S <sub>4</sub><br>nanosheets | -                                                                             | 231 mAh g <sup>-1</sup>                                                           | 1 A g <sup>-1</sup>                                       | 3M KOH      | 94%<br>5000           | 9            |
| NiMn-S                                                     | -                                                                             | 2510.15 F g <sup>-1</sup>                                                         | 1 A g <sup>-1</sup>                                       | 6M KOH      | 84.5%<br>5000         | 10           |
| CoNi <sub>2</sub> S <sub>4</sub> /CNFs                     | -                                                                             | 1870 mAh g <sup>-1</sup>                                                          | 4 A g <sup>-1</sup>                                       | 6M KOH      | 85.1%<br>5000         | 11           |
| ZnGa <sub>2</sub> S <sub>4</sub> hollow spheres            | -                                                                             | 358.4 mAh g <sup>-1</sup>                                                         | 2 A g <sup>-1</sup>                                       | 6M KOH      | 98.4%<br>5000         | 12           |
| Mn-Mo-S NSs                                                | 0.373 mAh cm <sup>-2</sup>                                                    | 392.6 mAh g <sup>-1</sup>                                                         | 2 mA cm <sup>-2</sup>                                     | 2M KOH      | 96.2%<br>10000        | This<br>work |

**Table S6.** Electrochemical properties comparison with recently reported literatures.

| Reported Devised                                                                         | Electrolyte | Device Window (V) | Energy density (Wh kg <sup>-1</sup> ) | Power Density (W kg <sup>-1</sup> ) | Stability (Cycles) | Ref.      |
|------------------------------------------------------------------------------------------|-------------|-------------------|---------------------------------------|-------------------------------------|--------------------|-----------|
| FeCo <sub>2</sub> S <sub>4</sub> @Ni@Gr//AC                                              | 3M KOH      | 0-1.6             | 65.8                                  | 849                                 | 89.2%<br>6000      | 2         |
| NiCo <sub>2</sub> S <sub>4</sub> /rGO//AC                                                | 6M KOH      | 0-1.7             | 41.52                                 | 1067                                | 82%<br>3000        | 3         |
| NiCoS@PPy//AC                                                                            | 2M KOH      | 0-1.6             | 34.4                                  | 799                                 | 84%<br>8500        | 4         |
| NiCo <sub>2</sub> S <sub>4</sub> @HCs//AC                                                | 2M KOH      | 0-1.6             | 69.6                                  | 847                                 | 90.2%<br>10000     | 6         |
| ZnCo <sub>2</sub> S <sub>4</sub> @ppy//AC                                                | 3M KOH      | 0-1.6             | 33.78                                 | 800.05                              | 90%<br>5000        | 7         |
| NiCo <sub>2</sub> S <sub>4</sub> @NiMoS <sub>4</sub> /Fe <sub>2</sub> O <sub>3</sub> /NG | KOH/PVA     | 0-1.6             | 72.3                                  | 460                                 | 90.5%<br>10000     | 13        |
| MnCo <sub>2</sub> S <sub>4</sub> NSs/Fe <sub>2</sub> O <sub>3</sub> @rGO                 | KOH/PVA     | 0-1.6             | 61.4                                  | 244                                 | 90.4 %<br>10000    | 14        |
| MnCo <sub>2</sub> S <sub>4</sub> /Co <sub>9</sub> S <sub>8</sub> //AC                    | 6M KOH      | 0-1.6             | 45.8                                  | 800                                 | 94.8%<br>5000      | 15        |
| CoMoS <sub>4</sub> @Ni-Co-S//AC                                                          | 3M KOH      | 0-1.6             | 49.1                                  | 800                                 | 90.3%<br>10000     | 16        |
| MoS <sub>2</sub> /NiCo <sub>2</sub> S <sub>4</sub> @C HMSs//AC                           | 6M KOH      | 0-1.6             | 53.01                                 | 4200                                | 90.1%<br>10000     | 17        |
| MnCo <sub>2</sub> S <sub>4</sub> /Co <sub>9</sub> S <sub>8</sub> //AC                    | 6M KOH      | 0-1.6             | 45.8                                  | 800                                 | 94.8%<br>5000      | 18        |
| NiCo <sub>2</sub> S <sub>4</sub> /BPC//BPC                                               | 3M KOH      | 0-1.6             | 38.5                                  | 738.1                               | 89%<br>4000        | 19        |
| NiCo <sub>2</sub> S <sub>4</sub> //ARHC                                                  | 2M KOH      | 0-1.6             | 41.1                                  | 400                                 | 62%<br>10000       | 20        |
| CoMoS <sub>4</sub> /RGO//AC                                                              | 1M KOH      | 0-1.5             | 59.4                                  | 1125                                | 99.3%<br>6000      | 21        |
| Mn-NiS NSs//ONAC                                                                         | KOH/PVA     | 0-1.65            | 44.2                                  | 825                                 | 90%<br>5000        | 22        |
| NiCo <sub>2</sub> S <sub>4</sub> -Ni <sub>9</sub> S <sub>8</sub> -C DYMs//rGO gel        | 6M KOH      | 0-1.6             | 51.0                                  | 1399.4                              | 84.5%<br>5000      | 23        |
| C/NiCo <sub>2</sub> S <sub>4</sub> //AC                                                  | 6M KOH      | 0-1.6             | 34.1                                  | 160                                 | 78.9%<br>4000      | 24        |
| NiCo <sub>2</sub> S <sub>4</sub> /CNT//Fe <sub>2</sub> O <sub>3</sub> /CNT               | 3M KOH      | 0-1.7             | 41.6                                  | 800                                 | 82%<br>5000        | 25        |
| Mn-Mo-S NSs//Fe <sub>2</sub> O <sub>3</sub> @rGO                                         | KOH/PVA     | 0-1.6             | 72.9                                  | 516.8                               | 94.6%<br>10000     | This work |

## References

- 1 S. Anand, A. Choudhury, *Mater. Chem. Phys.*, 2023, **299**, 127517.
- 2 X. Zheng, J. Jiang, T. Bi, F. Jin, M. Li, *ACS Appl. Energy Mater.*, 2021, **4**, 3288-3296.
- 3 A. I. A. Salam, S. Y. Attia, F. I. E. I. Hosiny, M. A. Sadek, S. G. Mohamed, M. M. Rashad, *Mater. Chem. Phys.*, 2022, **277**, 125554.
- 4 X. Zhao, Q. Ma, K. Tao, L. Han, *ACS Appl. Energy Mater.*, 2021, **4**, 4199-4207.
- 5 R. Xiong, X. Zhang, X. Xu, Z. Zhang, X. Tian, C. Wang, *Diam. Relat. Mater.*, 2022, **127**, 109183.
- 6 J. Zhao, Y. Wang, Y. Qian, H. Jin, X. Tang, Z. Huang, J. Lou, Q. Zhang, Y. Lei, S. Wang, *Adv. Funct. Mater.*, 2023, **33**, 2210238.
- 7 Y. Wang, C. Xiang, Y. Zou, F. Xu, L. Sun, J. Zhang, *J. Energy Storage*, 2021, **41**, 102838.
- 8 K. V. G. Raghavendra, C. V. V. M. Gopi, R. Vinodh, S. S. Rao, I. M. Obaidat, H. J. Kim, *J. Energy Storage*, 2020, **27**, 101159.
- 9 L. Abbasi, M. Arvand, S. E. Moosavifard, *Carbon*, 2020, **161**, 299-308.
- 10 X. Wang, C. Hao, J. Zhang, C. Ni, X. Wang, Y. Shen, *J. Power Sources*, 2022, **539**, 231594.
- 11 J. Zhu, C. Han, X. Song, *Mater. Chem. Phys.*, 2022, **283**, 126038.
- 12 A. M. Zardkhoshoui, M. M. Ashtiani, M. Sarparast, S. S. H. Davarani, *J. Power Sources*, 2020, **450**, 227691.
- 13 K. R. Shrestha, S. Kandula, N. H. Kim, J. H. Lee, *Chem. Eng. J.*, 2021, **405**, 127046.
- 14 C. Li, T. Zhao, X. Feng, S. Liu, L. Li, R. Zha, Y. Zhang, Z. Zhang, *J. Alloys Compd.*, 2021, **859**, 157815.
- 15 H. Jia, J. Wang, W. Fu, J. Hu, Y. Liu, *Chem. Eng. J.*, 2020, **391**, 123541.
- 16 F. Ma, X. Dai, J. Jin, N. Tie, Y. Dai, *Electrochim. Acta*, 2020, **331**, 135459.
- 17 Q. Li, W. Lu, Z. Li, J. Ning, Y. Zhong, Y. Hu, *Chem. Eng. J.*, 2020, **380**, 122544.
- 18 H. Jia, J. Wang, W. Fu, J. Hu, Y. Liu, *Chem. Eng. J.*, 2020, **391**, 123541.

- 19 J. Feng, X. Zhang, Q. Lu, E. Guo, M. Wei, *Energy Fuels*, 2022, **36**, 5424-5432.
- 20 Y. Gao, B. Wu, J. Hei, D. Gao, X. Xu, Z. Wei, H. Wu, *Electrochim. Acta*, 2020, **347**, 136314.
- 21 Z. Zhang, X. Zhang, X. Xu, R. Xiong, X. Tian, C. Wang, *Colloid. Surface. A*, 2022, **652**, 129762.
- 22 R. K. Devi, M. Ganesan, T. W. Chen, S. M. Chen, M. Akilarasan, S. P. Rwei, J. Yu, T. Elayappan, A. Shaju, *J. Alloy Compd.*, 2023, **944**, 169261.
- 23 Y. Yan, A. Li, C. Lu, T. Zhai, S. Lu, W. Li, W. Zhou, *Chem. Eng. J.*, 2020, **396**, 125316.
- 24 W. Lu, M. Yang, X. Jiang, Y. Yu, X. Liu, Y. Xing, *Chem. Eng. J.*, 2020, **382**, 122943.
- 25 X. Yang, X. He, Q. Li, J. Sun, Z. Lei, Z. H. Liu, *Energy Fuels*, 2021, **35**, 3449-3458.
